# Supplementary material for: The Brain’s Response to Reward Anticipation and Depression in Adolescence: Dimensionality, Specificity, and Longitudinal Predictions in a Community-Based Sample
Source: Atypon-hosted journal article supplement (doi:10.1176/appi.ajp.2015.14101298), 2015-06-18
Supplement: appi.ajp.2015.14101298.cx01.correction.pdf [file appi.ajp.2015.14101298.cx01.correction.pdf]

## **Correction**

In the article “The Brain’s Response to Reward Anticipation and Depression in Adolescence: Dimensionality, Specificity, and Longitudinal Predictions in a Community-Based Sample,” by Argyris Stringaris et al. (doi: 10.1176/appi.ajp.2015.14101298), originally published online on June 18, 2015, the list of authors sharing senior authorship should have read “Dr. Martinot, Dr. Schumann, and Dr. Paillère-Martinot contributed equally as senior authors.” This correction was made and the article was reposted on July 10, 2015.
